# Supplementary material for: De novo transcriptome assembly reveals high transcriptional complexity in Pisum sativum axillary buds and shows rapid changes in expression of diurnally regulated genes
Source: PubMed Central journal article supplement (PMC5335751; doi:10.1186/s12864-017-3577-x), 2017-03-02

**Figure S2:** The number of reads aligning to the *PsApxI* mRNA sequence and the alignment between *PsApxI* mRNA and its best hit to the pea bud transcriptome, comp92406\_c0\_seq1

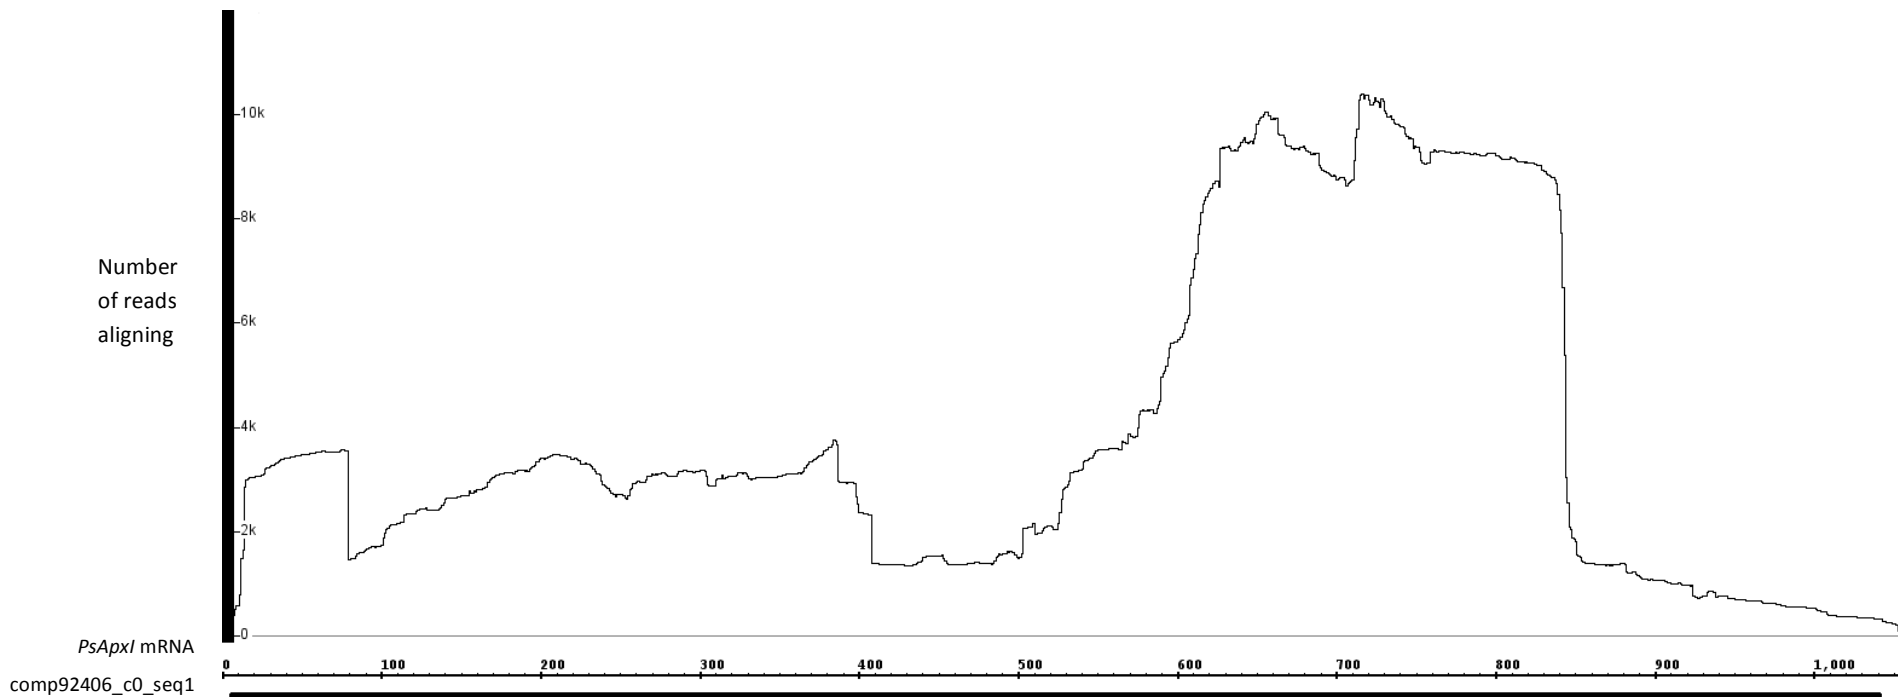

**Figure S3:** The number of reads aligning to the *PsBRC1* CDS and the alignment between *PsBRC1* CDS and its best hit to the pea bud transcriptome, comp78442\_c0\_seq1

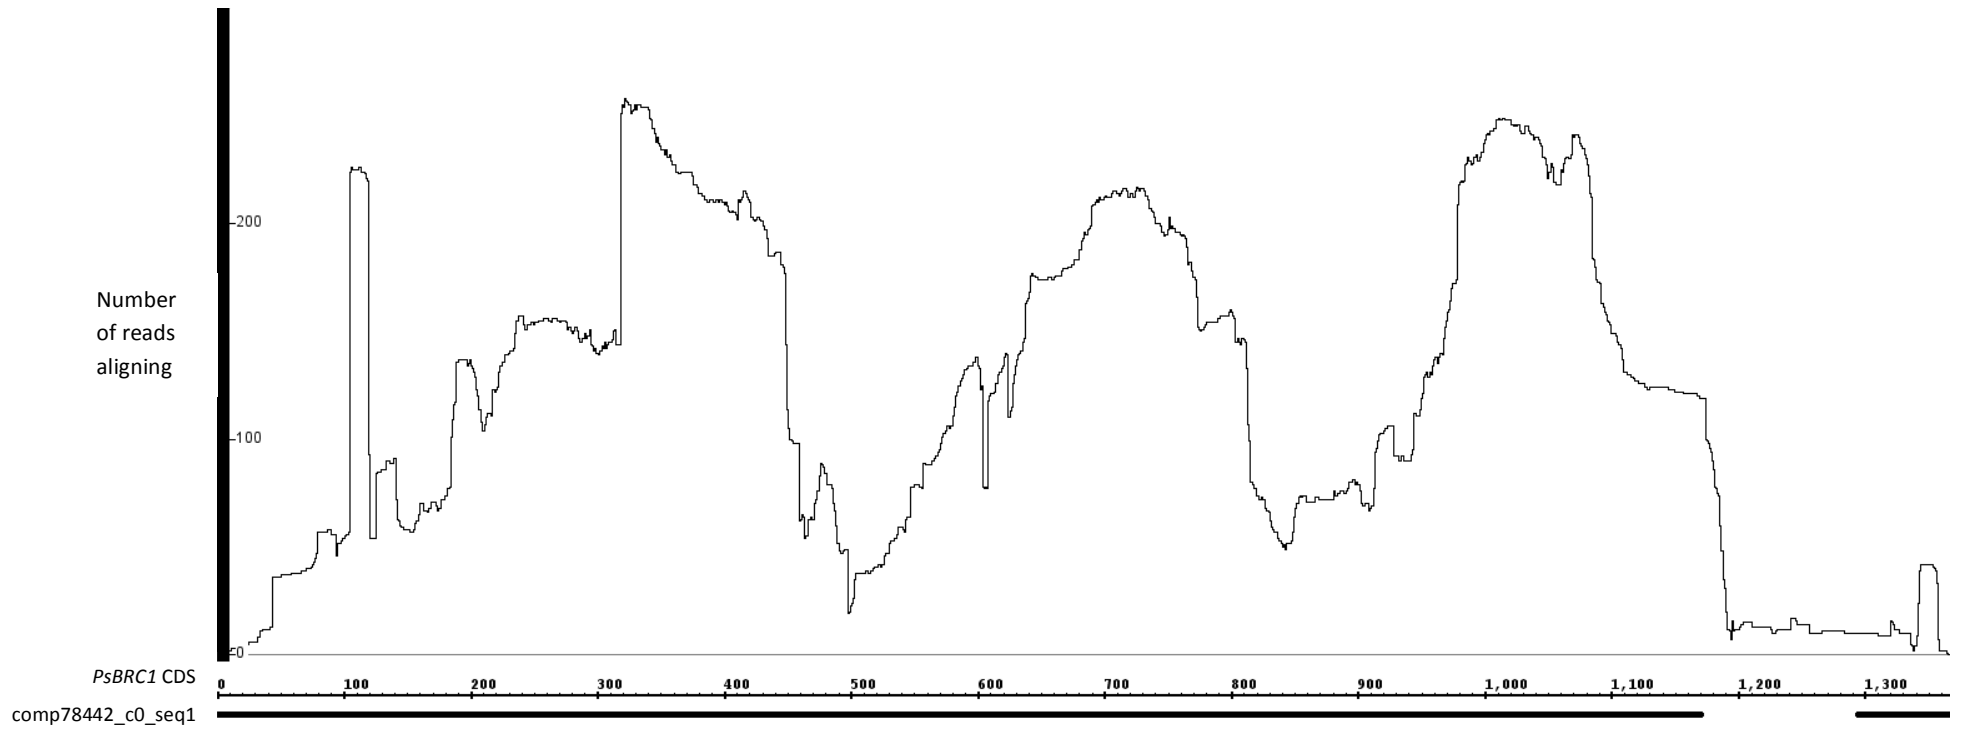

**Figure S4:** The number of reads aligning to the *PsEXGT1* mRNA and the alignment between *PsEXGT1* mRNA and its best hits to the pea bud transcriptome, comp88216\_c0\_seq1, 5, 7, 8, 11, 13, 14

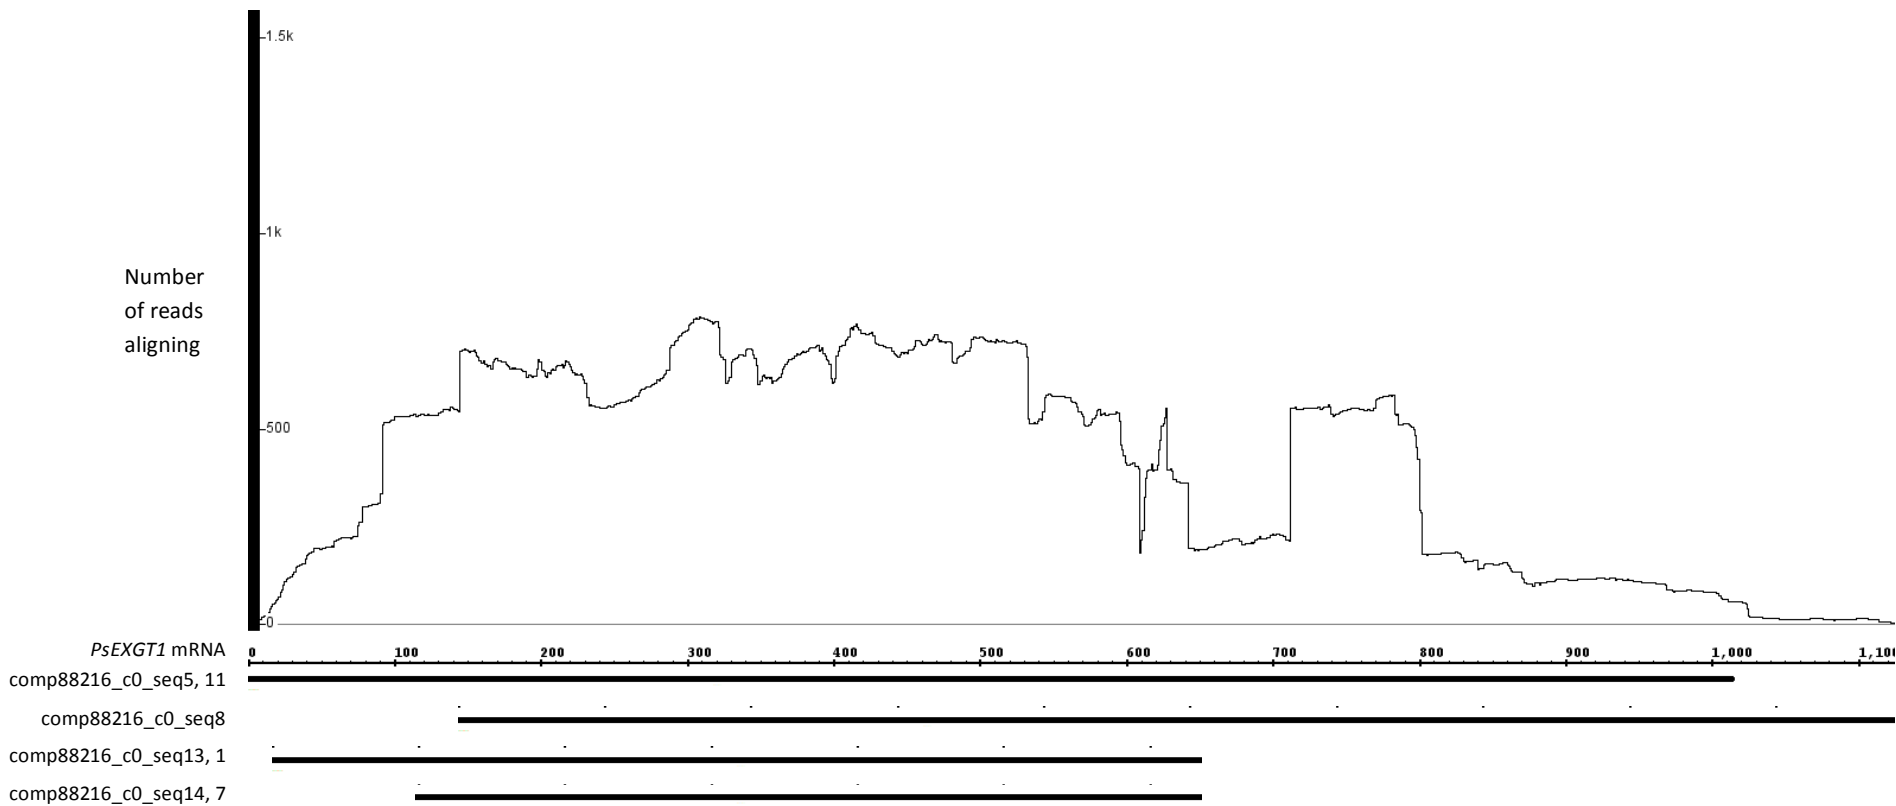

**Figure S5:** The number of reads aligning to the *PsFed-1* CDS and the alignment between *PsFed-1* CDS and its best hits to the pea bud transcriptome, comp55599\_c1\_seq1 and comp351273\_c0\_seq1

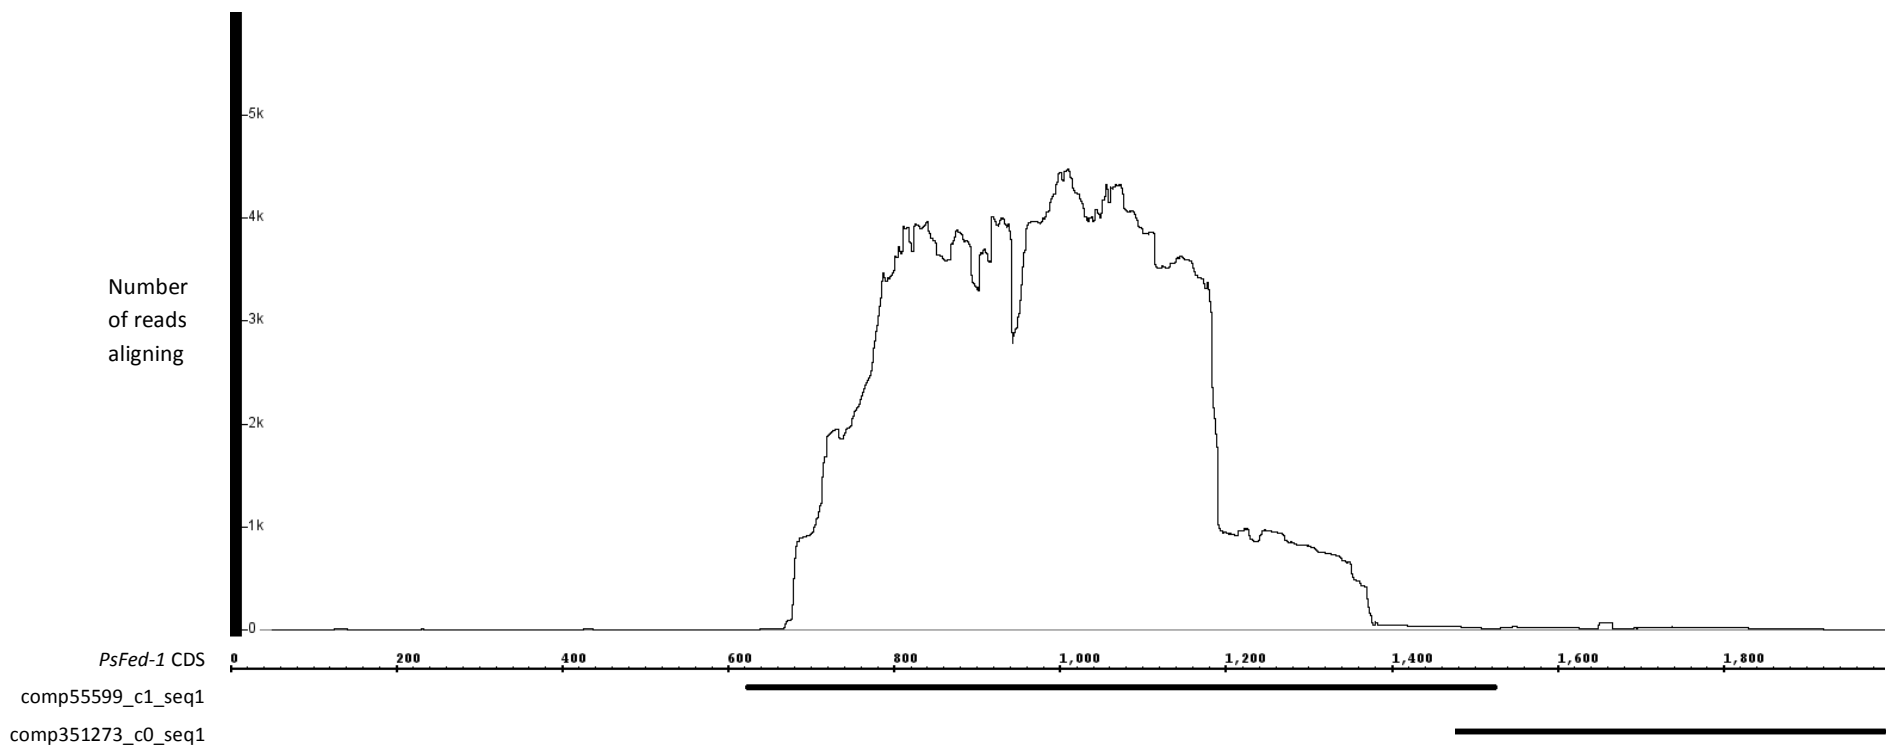

**Figure S6:** The number of reads aligning to the *PsHMG-1* mRNA and the alignment between *PsHMG-1* mRNA and its best hit to the pea bud transcriptome, comp81333\_c0\_seq1

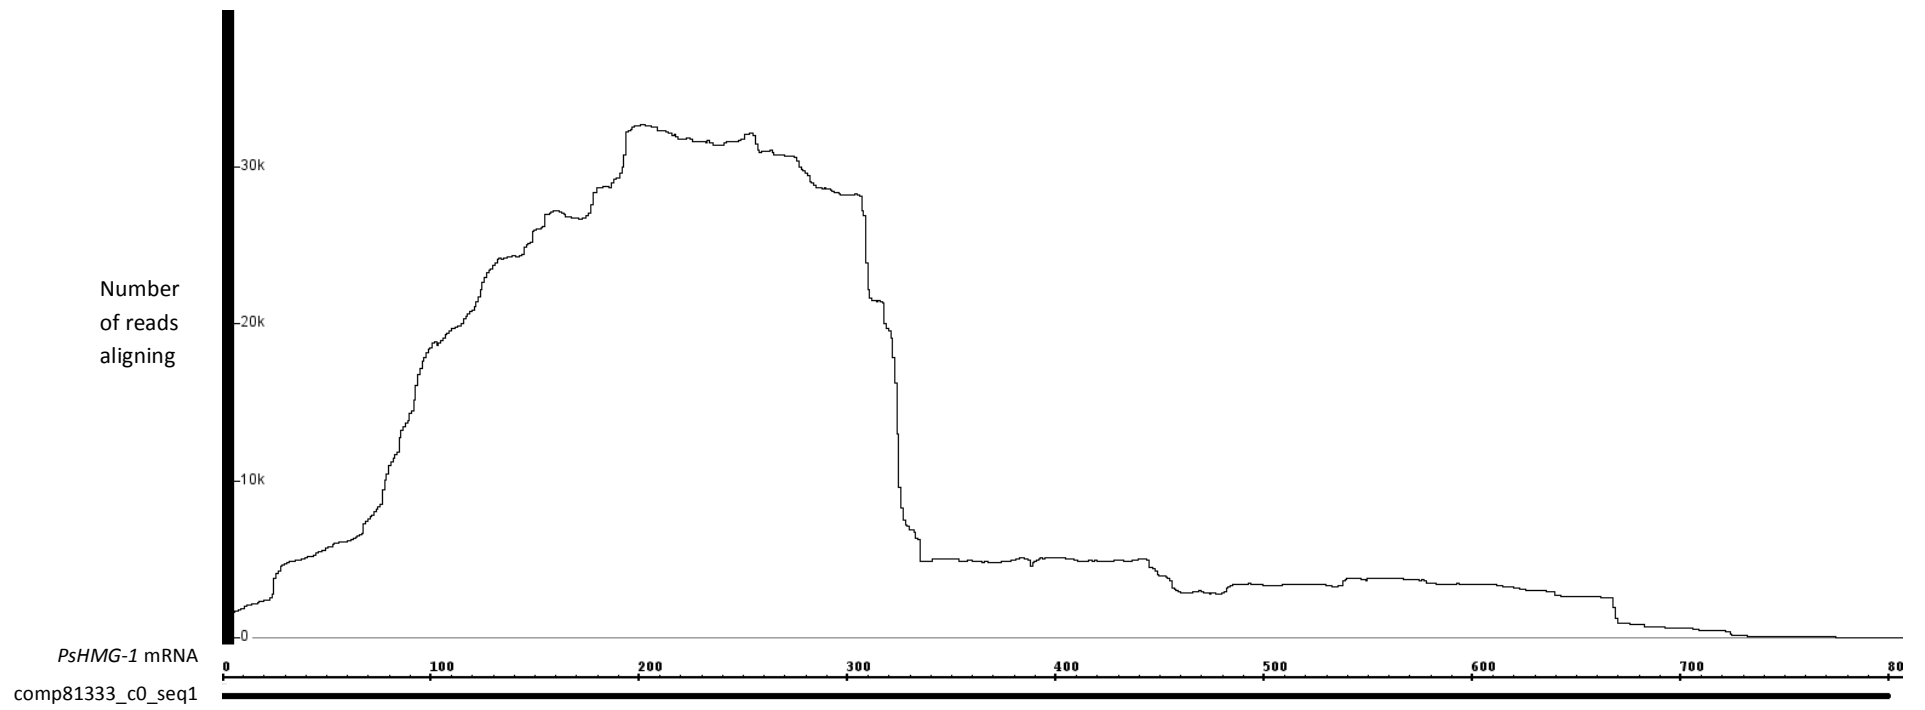

**Figure S7:** The number of reads aligning to the *PsKO1* mRNA and the alignment between *PsKO1* mRNA and its best hits to the pea bud transcriptome, comp71699\_c1\_seq1, 2, 3, 4

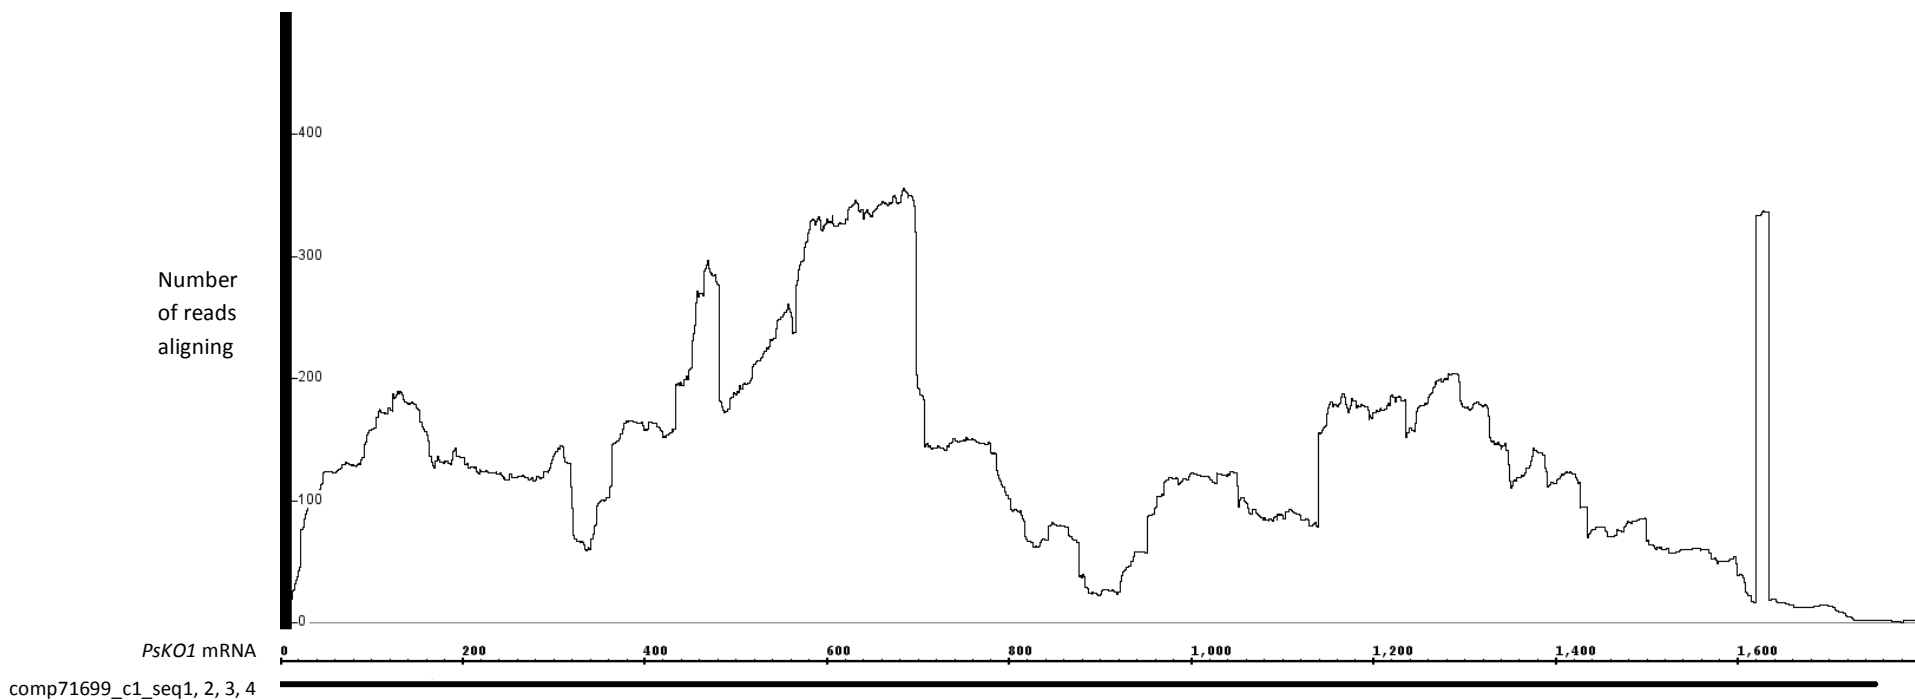

**Figure S8:** The number of reads aligning to the *PsPCNA* mRNA and the alignment between *PsPCNA* mRNA and its best hit to the pea bud transcriptome, comp93178\_c0\_seq1

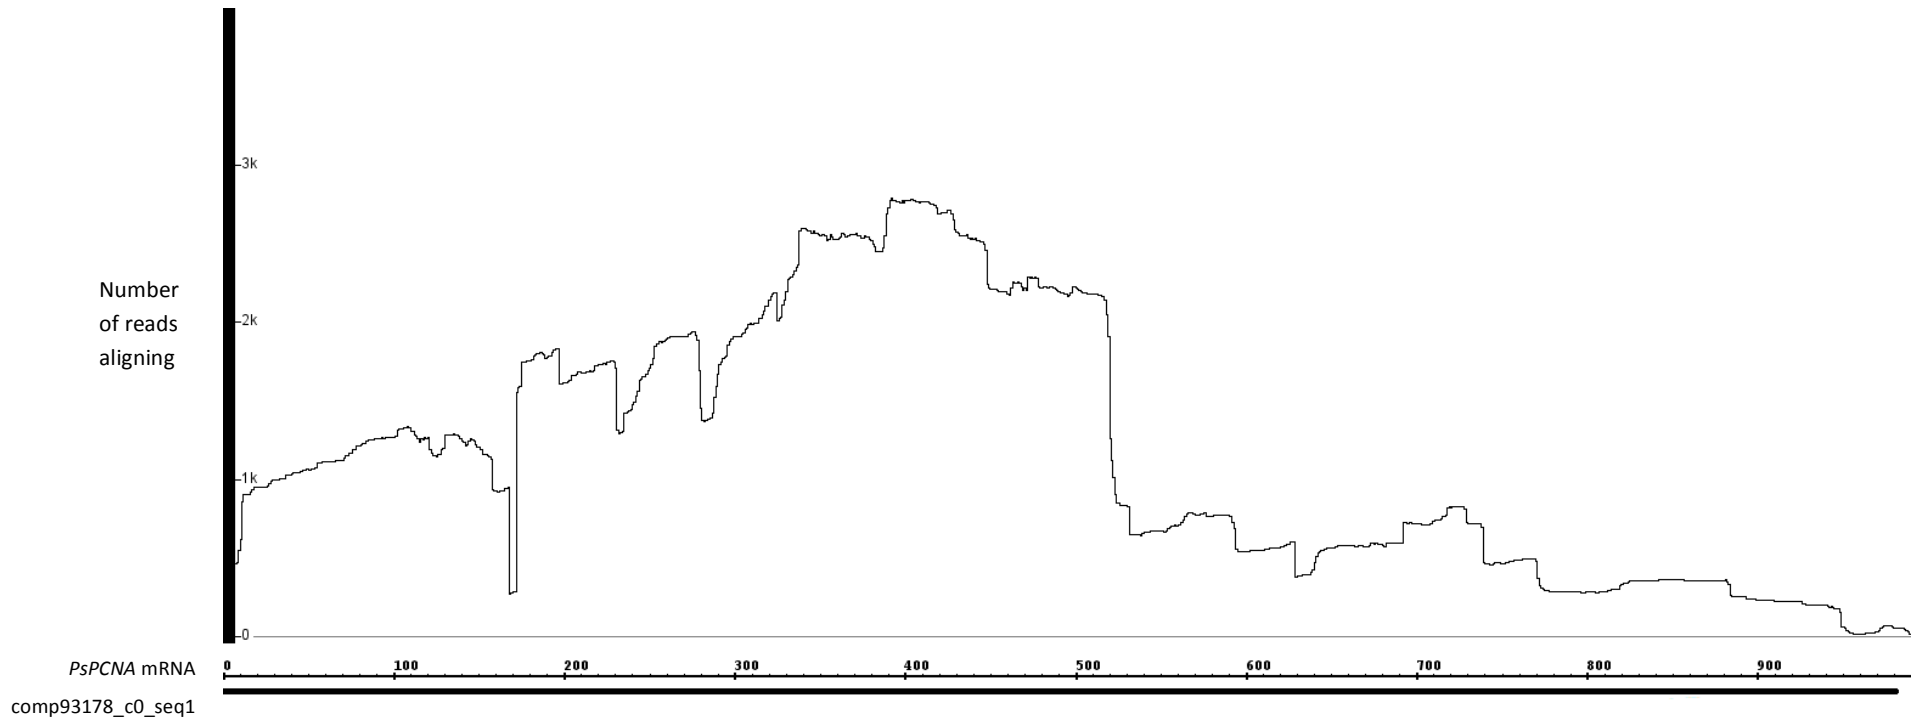

**Figure S9:** The number of reads aligning to the *PsPETE* gene and the alignment between *PsPETE* gene and its best hit to the pea bud transcriptome, comp92360\_c0\_seq1

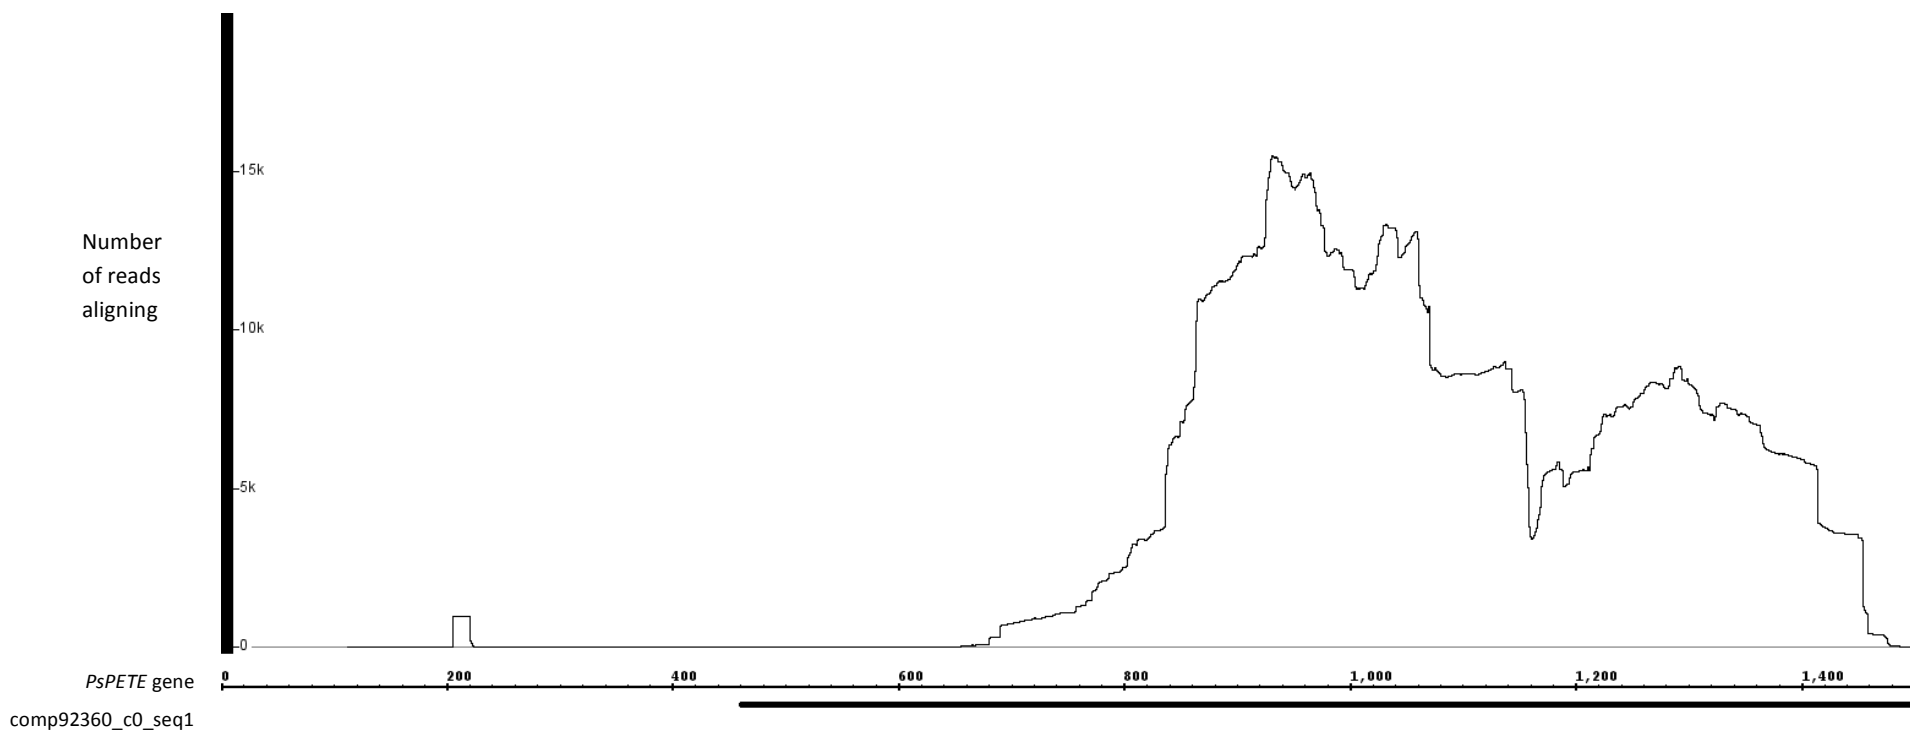



**Figure S10:** The number of reads aligning to the *PsRMS4* CDS and the alignment between *PsRMS4* CDS and its best hit to the pea bud transcriptome, comp97254\_c0\_seq1

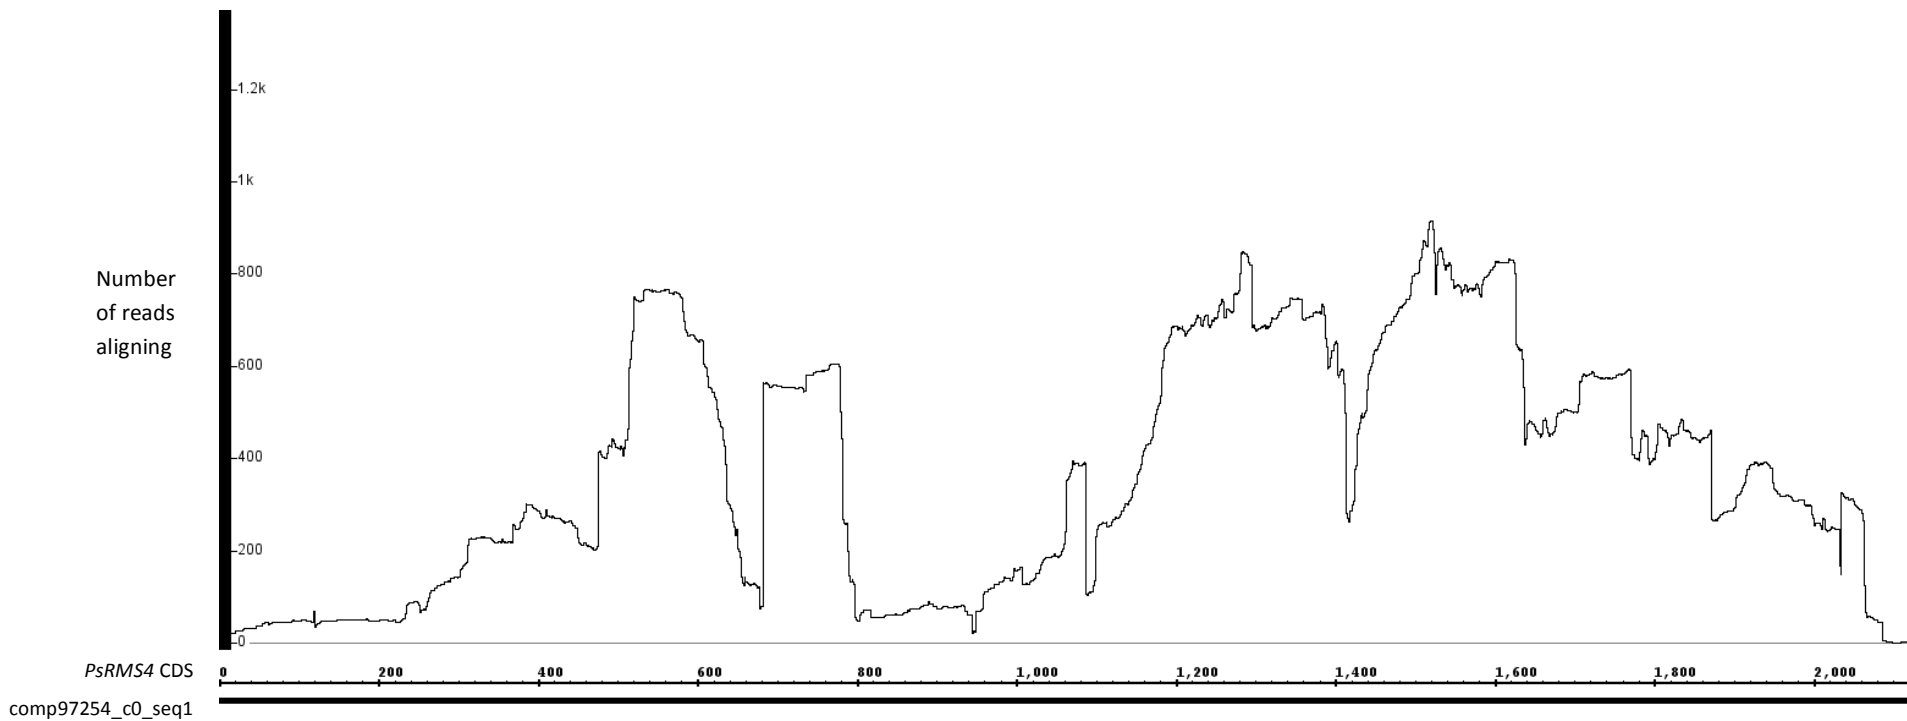

**Figure S11:** The number of reads aligning to the *PsRMS5* CDS and the alignment between *PsRMS5* CDS and its best hits to the pea bud transcriptome, comp74555\_c0\_seq1 and comp27382\_c0\_seq1

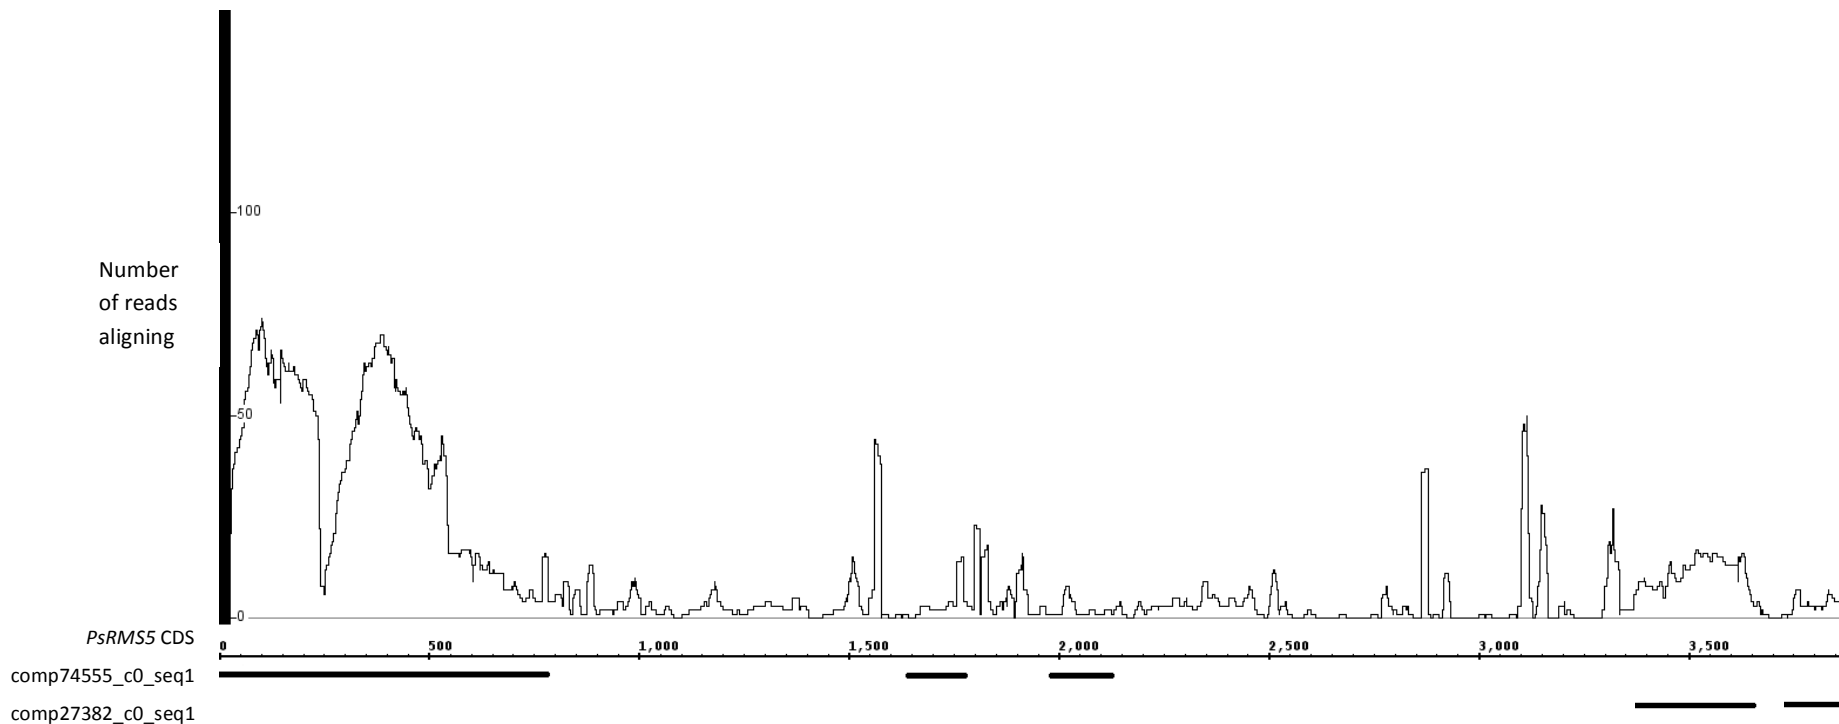

Supplement: 12864_2017_3577_MOESM2_ESM.pdf [file 12864_2017_3577_MOESM2_ESM.pdf]
