# Supplementary material for: De novo transcriptome assembly reveals high transcriptional complexity in Pisum sativum axillary buds and shows rapid changes in expression of diurnally regulated genes
Source: PubMed Central journal article supplement (PMC5335751; doi:10.1186/s12864-017-3577-x), 2017-03-02
Supplement: 12864_2017_3577_MOESM1_ESM.pdf [file 12864_2017_3577_MOESM1_ESM.pdf]

**Table S1:** Summary of the statistics for the raw and cleaned MiSeq paired-end reads

|                          | <b>Raw</b>  | <b>Cleaned</b> |
|--------------------------|-------------|----------------|
| Total # paired-end reads | 101,707,414 | 90,049,877     |
| Ave. read length (bp)    | 196         | 122            |
| Ave. Q20 %               | 29.8 ± 0.52 | 33.8 ± 0.22    |
| Ave. N%                  | 1.42 ± 0.58 | 0.59 ± 0.29    |
| Ave. GC %                | 43.8 ± 0.38 | 42.2 ± 0.39    |

**Table S2:** Read quality statistics for Read 1 and Read 2 of each of the 24 RNA libraries sequenced

| Sample | Treatment        | Treatment length (hours) | Harvest time window | Read | Before cleaning |          |      | After cleaning |          |      |
|--------|------------------|--------------------------|---------------------|------|-----------------|----------|------|----------------|----------|------|
|        |                  |                          |                     |      | Q20 %           | N %      | GC % | Q20 %          | N %      | GC % |
| 1      | Mock             | 1                        | 1<br>(13:30-14:10)  | 1    | 27.03           | 3.24E-02 | 42   | 33.68          | 2.58E-03 | 41   |
|        |                  |                          |                     | 2    | 32.23           | 1.34E-02 | 41   | 34.41          | 2.33E-03 | 40   |
| 2      | <i>rac</i> -GR24 | 1                        | 1<br>(13:30-14:10)  | 1    | 29.14           | 7.94E-02 | 40   | 33.09          | 4.33E-03 | 38   |
|        |                  |                          |                     | 2    | 34.7            | 5.61E-02 | 39   | 35.54          | 1.21E-02 | 38   |
| 3      | Mock             | 2                        | 1<br>(13:30-14:10)  | 1    | 28.92           | 1.10E-01 | 42   | 33             | 4.12E-03 | 41   |
|        |                  |                          |                     | 2    | 34.92           | 5.47E-02 | 40   | 35.96          | 1.24E-02 | 39   |
| 4      | <i>rac</i> -GR24 | 2                        | 1<br>(13:30-14:10)  | 1    | 27.04           | 8.57E-02 | 43   | 33.15          | 8.82E-03 | 41   |
|        |                  |                          |                     | 2    | 32.25           | 1.67E-02 | 40   | 33.86          | 1.29E-02 | 39   |
| 5      | Mock             | 4                        | 1<br>(13:30-14:10)  | 1    | 25.17           | 1.80E-01 | 46   | 34.07          | 5.12E-03 | 44   |
|        |                  |                          |                     | 2    | 32.17           | 1.57E-02 | 46   | 34.07          | 1.42E-02 | 46   |
| 6      | <i>rac</i> -GR24 | 4                        | 1<br>(13:30-14:10)  | 1    | 26.88           | 8.84E-02 | 45   | 33.67          | 2.41E-03 | 43   |
|        |                  |                          |                     | 2    | 31.81           | 1.32E-02 | 45   | 33.89          | 2.25E-03 | 44   |
| 7      | Mock             | 6                        | 1<br>(13:30-14:10)  | 1    | 26.54           | 1.49E-01 | 46   | 32.43          | 8.45E-03 | 44   |
|        |                  |                          |                     | 2    | 31.81           | 1.75E-02 | 46   | 33.47          | 1.27E-02 | 45   |
| 8      | <i>rac</i> -GR24 | 6                        | 1<br>(13:30-14:10)  | 1    | 25.45           | 6.84E-01 | 45   | 32.22          | 3.56E-03 | 42   |
|        |                  |                          |                     | 2    | 23.7            | 14.9     | 45   | 29.25          | 6.18     | 43   |
| 9      | Mock             | 1                        | 2<br>(14:10-14:50)  | 1    | 26.71           | 4.15E-02 | 43   | 33.05          | 2.83E-04 | 41   |
|        |                  |                          |                     | 2    | 32.27           | 1.74E-02 | 41   | 33.62          | 1.00E-02 | 40   |
| 10     | <i>rac</i> -GR24 | 1                        | 2<br>(14:10-14:50)  | 1    | 28.69           | 2.79E-02 | 48   | 32.8           | 3.85E-03 | 47   |
|        |                  |                          |                     | 2    | 34.61           | 5.67E-02 | 50   | 35.73          | 1.38E-02 | 48   |
| 11     | Mock             | 2                        | 2<br>(14:10-14:50)  | 1    | 25.58           | 6.08E-01 | 44   | 32.31          | 3.71E-03 | 41   |
|        |                  |                          |                     | 2    | 24.26           | 14.75    | 41   | 29.63          | 6.34     | 40   |
| 12     | <i>rac</i> -GR24 | 2                        | 2<br>(14:10-14:50)  | 1    | 25.43           | 3.58E-02 | 44   | 34.34          | 4.90E-03 | 41   |
|        |                  |                          |                     | 2    | 33.61           | 1.54E-02 | 42   | 35.42          | 1.51E-02 | 40   |
| 13     | Mock             | 4                        | 2<br>(14:10-14:50)  | 1    | 33.32           | 1.02E-01 | 41   | 34.59          | 6.81E-03 | 41   |
|        |                  |                          |                     | 2    | 35.08           | 1.05E-01 | 41   | 35.79          | 1.17E-02 | 39   |
| 14     | <i>rac</i> -GR24 | 4                        | 2<br>(14:10-14:50)  | 1    | 26.9            | 1.26     | 45   | 33.83          | 2.72E-03 | 44   |
|        |                  |                          |                     | 2    | 30.91           | 1.29E-02 | 45   | 34.17          | 2.41E-03 | 43   |
| 15     | Mock             | 6                        | 2<br>(14:10-14:50)  | 1    | 25.36           | 4.89E-02 | 44   | 34.14          | 4.84E-03 | 41   |
|        |                  |                          |                     | 2    | 31.7            | 1.53E-02 | 41   | 33.95          | 1.35E-02 | 40   |
| 16     | <i>rac</i> -GR24 | 6                        | 2<br>(14:10-14:50)  | 1    | 33.24           | 8.29E-02 | 42   | 34.52          | 6.41E-03 | 41   |
|        |                  |                          |                     | 2    | 35.39           | 1.06E-01 | 41   | 35.98          | 1.21E-02 | 40   |
| 17     | Mock             | 1                        | 3<br>(15:50-16:20)  | 1    | 28.49           | 3.27E-02 | 49   | 32.67          | 4.08E-03 | 47   |
|        |                  |                          |                     | 2    | 33.9            | 5.52E-02 | 51   | 35.13          | 1.28E-02 | 50   |
| 18     | <i>rac</i> -GR24 | 1                        | 3<br>(15:50-16:20)  | 1    | 25.6            | 4.13E-02 | 44   | 34.51          | 5.04E-03 | 42   |
|        |                  |                          |                     | 2    | 32.61           | 1.51E-02 | 42   | 34.8           | 1.41E-02 | 41   |

|    |                  |   |               |   |       |          |    |       |          |    |
|----|------------------|---|---------------|---|-------|----------|----|-------|----------|----|
| 19 | Mock             | 2 | 3             | 1 | 27.3  | 9.82E-02 | 43 | 33.83 | 2.85E-03 | 42 |
|    |                  |   | (15:50-16:20) | 2 | 31.37 | 1.28E-02 | 43 | 33.85 | 2.03E-03 | 42 |
| 20 | <i>rac</i> -GR24 | 2 | 3             | 1 | 25.96 | 6.64E-01 | 44 | 32.59 | 4.09E-03 | 41 |
|    |                  |   | (15:50-16:20) | 2 | 25.78 | 14.8     | 42 | 30.48 | 9.32     | 40 |
| 21 | Mock             | 4 | 3             | 1 | 29.16 | 2.16     | 46 | 33.37 | 8.87E-03 | 45 |
|    |                  |   | (15:50-16:20) | 2 | 23.53 | 13.5     | 46 | 31.03 | 6.18     | 44 |
| 22 | <i>rac</i> -GR24 | 4 | 3             | 1 | 33.14 | 8.23E-01 | 46 | 34.89 | 7.09E-03 | 46 |
|    |                  |   | (15:50-16:20) | 2 | 34.27 | 1.01E-01 | 46 | 35.77 | 1.20E-02 | 45 |
| 23 | Mock             | 6 | 3             | 1 | 33.1  | 6.72E-01 | 44 | 34.76 | 6.77E-03 | 43 |
|    |                  |   | (15:50-16:20) | 2 | 34.22 | 9.83E-02 | 45 | 35.53 | 1.02E-02 | 43 |
| 24 | <i>rac</i> -GR24 | 6 | 3             | 1 | 29.33 | 1.18     | 43 | 34.14 | 1.28E-02 | 41 |
|    |                  |   | (15:50-16:20) | 2 | 31.18 | 1.65E-02 | 43 | 34.73 | 1.22E-02 | 40 |

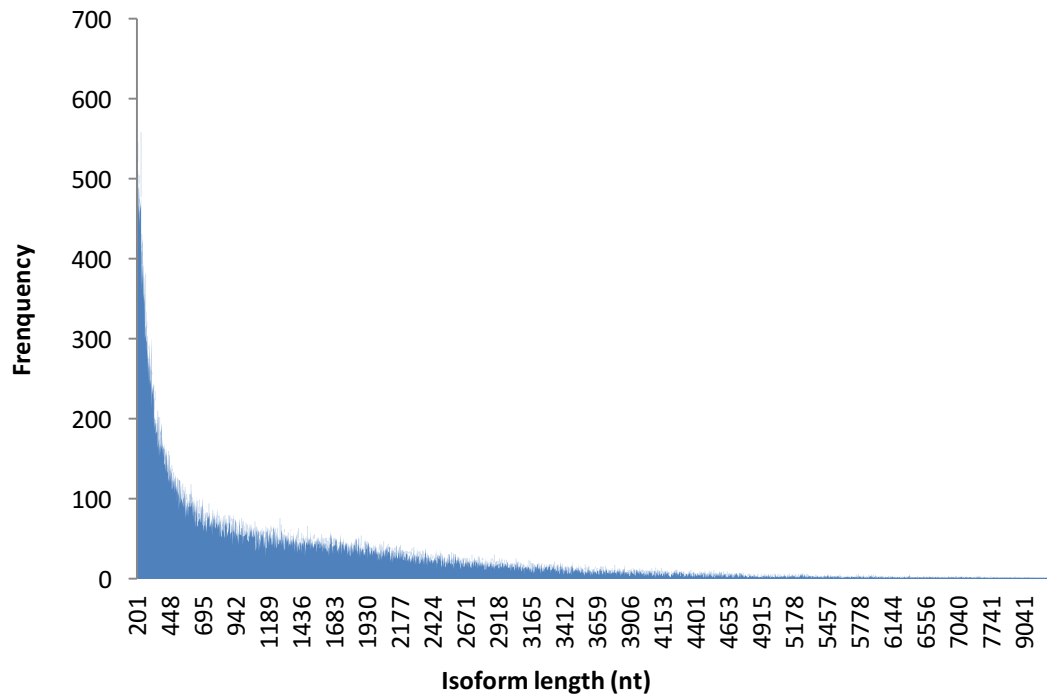

**Figure S1:** Length distribution of the isoforms in the pea axillary bud transcriptome

**Table S3:** Comparison of the *Pisum sativum* bud transcriptome isoforms using BLASTN ( $1E^{-03}$ ) and specifying a minimum hit coverage of 80%.

| Type of match                                | # matches      |
|----------------------------------------------|----------------|
| Self                                         | 194,020        |
| Different isoform within the same transcript | 56,077         |
| Different transcript                         | 6              |
| <b>Total</b>                                 | <b>250,103</b> |

**Table S4:** BLASTX ( $1E^{-100}$ ) results comparing single copy pea reference sequences against the pea axillary bud transcriptome

| Pea sequence   | Sequence type | Pea sequence length (bp) | Transcriptome match | Transcriptome match length (bp) | Alignment length (bp) | Pea sequence coverage | Positives | Gaps |
|----------------|---------------|--------------------------|---------------------|---------------------------------|-----------------------|-----------------------|-----------|------|
| <i>PsApx1</i>  | mRNA          | 1054                     | comp92406_c0_seq1   | 1674                            | 1034                  | 98.0%                 | 1033      | 1    |
| <i>PsBRC1</i>  | CDS           | 1367                     | comp78442_c0_seq1   | 2079                            | 1170                  | 85.3%                 | 1166      | 0    |
| <i>PsEXGT1</i> | mRNA          | 1125                     | comp88216_c0_seq5   | 1248                            | 1124                  | 99.5%                 | 1119      | 0    |
|                |               |                          | comp88216_c0_seq11  | 1080                            | 821                   | 72.9%                 | 820       | 0    |
|                |               |                          | comp88216_c0_seq8   | 1170                            | 627                   | 55.7%                 | 627       | 0    |
|                |               |                          | comp88216_c0_seq13  | 1580                            | 648                   | 56.6%                 | 637       | 0    |
|                |               |                          | comp88216_c0_seq1   | 1256                            | 648                   | 56.6%                 | 637       | 0    |
|                |               |                          | comp88216_c0_seq14  | 1412                            | 345                   | 30.0%                 | 338       | 0    |
|                |               |                          | comp88216_c0_seq7   | 1088                            | 345                   | 30.0%                 | 338       | 0    |
| <i>PsFed-1</i> | CDS           | 1995                     | comp55599_c1_seq1   | 1079                            | 900                   | 45.1%                 | 900       | 0    |
|                |               |                          | comp351273_c0_seq1  | 1058                            | 527                   | 25.5%                 | 509       | 9    |
| <i>PsHMG-1</i> | mRNA          | 807                      | comp81333_c0_seq1   | 1208                            | 798                   | 97.9%                 | 790       | 0    |
| <i>PsKO1</i>   | mRNA          | 1797                     | comp71699_c1_seq1   | 1791                            | 1754                  | 97.6%                 | 1754      | 0    |
|                |               |                          | comp71699_c1_seq4   | 1977                            | 1627                  | 90.5%                 | 1627      | 0    |
|                |               |                          | comp71699_c1_seq3   | 2076                            | 1164                  | 64.7%                 | 1163      | 0    |
|                |               |                          | comp71699_c1_seq2   | 1890                            | 1164                  | 64.7%                 | 1163      | 0    |
| <i>PsPCNA</i>  | mRNA          | 948                      | comp93178_c0_seq1   | 1095                            | 926                   | 96.8%                 | 918       | 5    |
| <i>PsPETE</i>  | Genomic       | 1505                     | comp92360_c0_seq1   | 1084                            | 1044                  | 69.0%                 | 1038      | 2    |
| <i>PsRMS4</i>  | CDS           | 2127                     | comp97254_c0_seq1   | 2895                            | 2127                  | 99.8%                 | 2123      | 0    |
| <i>PsRMS5</i>  | CDS           | 3880                     | comp74555_c0_seq1   | 1085                            | 788                   | 20.0%                 | 776       | 6    |
|                |               |                          | comp27382_c0_seq1   | 423                             | 291                   | 7.4%                  | 289       | 0    |

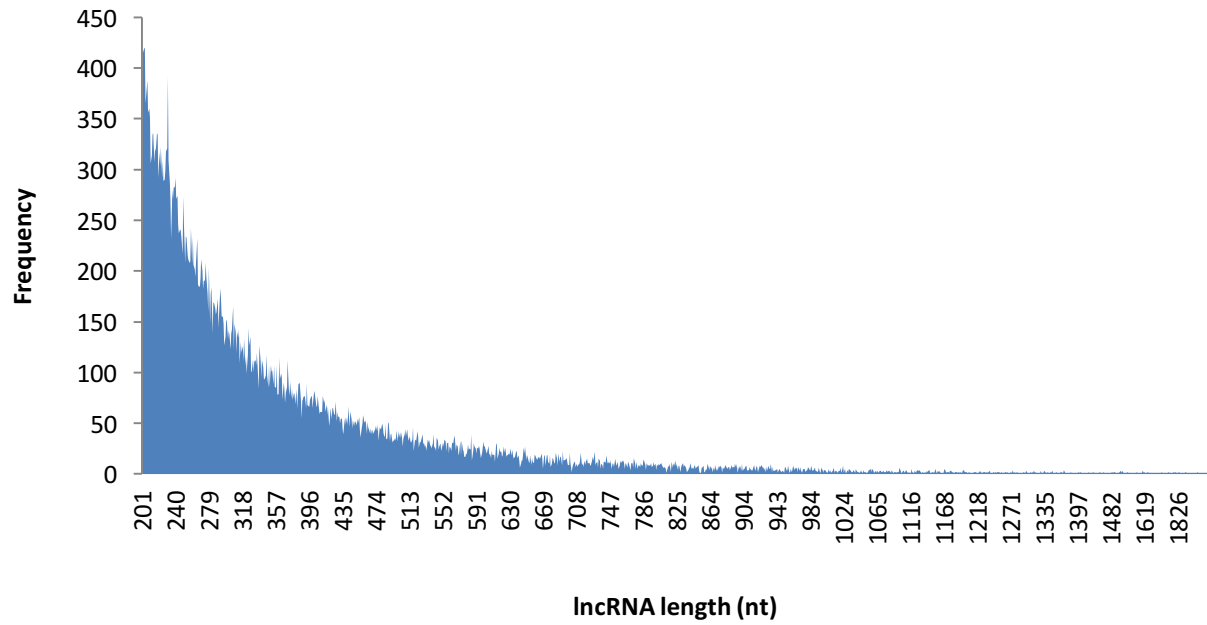

**Figure S12:** Length distribution of the long non-coding RNA in the pea axillary bud transcriptome

**Table S8:** Summary of the number of sequences with similarity to a pea repetitive DNA sequence [23] using BLAST ( $1E^{-10}$ )

| <b>Abbrev.</b> | <b>Type of repeat</b>   | <b>Transcriptome<br/>All Isoforms</b> | <b>Transcriptome<br/>Longest Isoform</b> | <b>lncRNA</b> |
|----------------|-------------------------|---------------------------------------|------------------------------------------|---------------|
| RLGTT          | LTR/gypsy/Tat           | 267                                   | 118                                      | 48            |
| RLGOG          | LTR/gypsy/Ogre          | 4,307                                 | 1,625                                    | 2,094         |
| RLGCH          | LTR/gypsy/chromo        | 317                                   | 127                                      | 138           |
| RLGAT          | LTR/gypsy/Athila        | 936                                   | 336                                      | 259           |
| RLCTK          | LTR/copia/Tork          | 167                                   | 46                                       | 23            |
| RLCTR          | LTR/copia/TAR           | 76                                    | 29                                       | 10            |
| RLCMX          | LTR/copia/Maximus       | 1,247                                 | 439                                      | 364           |
| RLCIV          | LTR/copia/Ivana         | 512                                   | 158                                      | 42            |
| RLCAN          | LTR/copia/Angela        | 87                                    | 22                                       | 41            |
| RLCA2          | LTR/copia/Alell         | 219                                   | 31                                       | 16            |
| RLCA1          | LTR/copia/Alel          | 8                                     | 3                                        | 1             |
| RLXXX          | LTR/unclassified        | 387                                   | 89                                       | 117           |
| TRIMx          | LTR/TRIM                | 97                                    | 46                                       | 50            |
| DHHxx          | Helitron                | 10                                    | 6                                        | 0             |
| DTMxx          | DNA/MULE                | 230                                   | 78                                       | 55            |
| DTAxx          | DNA/hAT                 | 7                                     | 3                                        | 0             |
| DTCxx          | DNA/CACTA               | 395                                   | 40                                       | 33            |
| SAT09          | Satellite/PST_TR9       | 1                                     | 1                                        | 1             |
| SAT07          | Satellite/PST_TR7       | 0                                     | 0                                        | 0             |
| SAT03          | Satellite/PST_TR3       | 1                                     | 1                                        | 1             |
| SAT27          | Satellite/PST_TR27      | 3                                     | 1                                        | 0             |
| SAT25          | Satellite/PST_TR25      | 2                                     | 1                                        | 0             |
| SAT11          | Satellite/PST_TR11_TR19 | 62                                    | 15                                       | 58            |
| SAT01          | Satellite/PST_TR1       | 24                                    | 3                                        | 16            |
| SAT06          | Satellite/PS_TR6        | 1                                     | 1                                        | 1             |
| SAT0B          | Satellite/PisTR-B       | 2                                     | 2                                        | 2             |
| SATxx          | Satellite/other         | 20                                    | 4                                        | 13            |
| RDN05          | rDNA/5S                 | 1                                     | 1                                        | 0             |
| RDN45          | rDNA/45S                | 6                                     | 6                                        | 2             |
| CONTM          | contam.                 | 1                                     | 1                                        | 0             |
| PLAST          | plastid                 | 24                                    | 13                                       | 0             |
| XXXXX          | unclassified repeat     | 2,617                                 | 954                                      | 789           |
|                | <b>Total repeats</b>    | <b>12,034</b>                         | <b>4,200</b>                             | <b>4,174</b>  |
|                | <b>Total in set</b>     | <b>194,067</b>                        | <b>81,773</b>                            | <b>47,322</b> |



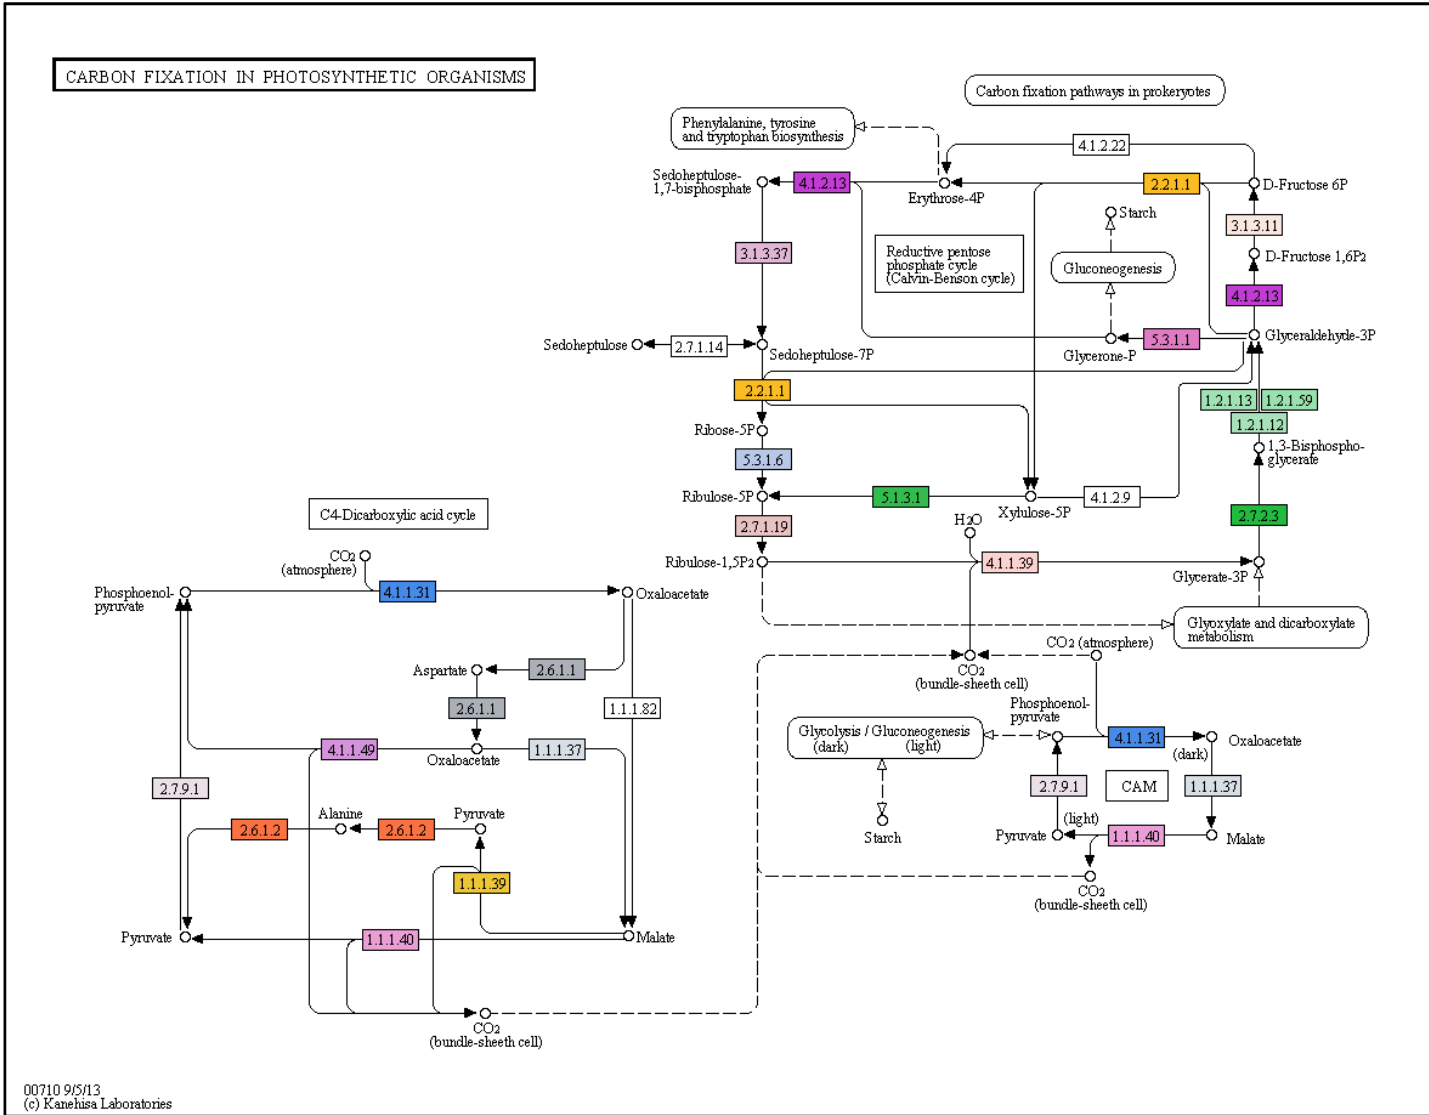

**Figure S13:** The carbon fixation in photosynthetic organisms KEGG pathway with enzymes highlighted that were identified in the pea axillary bud transcriptome.

**Table S16:** Timetable of sample harvest for the differential expression analysis

| <b>Time window</b>       | <b>1</b>      | <b>2</b>      | <b>3</b>       |
|--------------------------|---------------|---------------|----------------|
| <b>Time</b>              | 13:30 - 14:10 | 14:10 - 14:50 | 15:50 - 16:20  |
| <b>Samples harvested</b> | 1, 3, 5, 7    | 9, 11, 13, 15 | 17, 19, 21, 23 |

**Table S17:** List of 37 transcripts identified as DE in a pairwise comparison between time window 2 and time window 3

| <b>Transcript</b> | <b>Fold change</b> | <b>FDR</b>  |
|-------------------|--------------------|-------------|
| comp55670_c0      | 29.99273454        | 6.71E-05    |
| comp38965_c0      | 67.96124778        | 6.74E-05    |
| comp91844_c6      | 21.89150914        | 6.74E-05    |
| comp35107_c1      | 12.87711767        | 0.000615261 |
| comp91844_c0      | 191.4521392        | 0.000615261 |
| comp80518_c0      | 155.7358145        | 0.000615261 |
| comp92923_c0      | 37.90478548        | 0.000615261 |
| comp81803_c0      | 2.937871057        | 0.001049039 |
| comp388637_c0     | 66.33635356        | 0.001480698 |
| comp86806_c0      | 84.25789332        | 0.001568536 |
| comp51650_c0      | 86.01018718        | 0.001568536 |
| comp72075_c0      | 2.345996512        | 0.001756021 |
| comp55670_c1      | 47.76202731        | 0.001858386 |
| comp90592_c12     | 12.9588119         | 0.003091317 |
| comp91844_c4      | 30.36488816        | 0.00500408  |
| comp91844_c5      | 92.66608899        | 0.008037182 |
| comp79487_c0      | 0.105749722        | 0.012025699 |
| comp55670_c2      | 16.62011456        | 0.012465091 |
| comp82517_c0      | 4.349992898        | 0.012465091 |
| comp35755_c0      | 5.244088628        | 0.020082174 |
| comp55149_c0      | 0.503804682        | 0.02193618  |
| comp92265_c0      | 9.22923673         | 0.02193618  |
| comp89084_c0      | 29.43663111        | 0.02193618  |
| comp48055_c0      | 28.22927049        | 0.023531557 |
| comp83707_c0      | 2.034885925        | 0.023921647 |
| comp89415_c1      | 2.098533173        | 0.026265933 |
| comp91844_c1      | 37.55825232        | 0.028886441 |
| comp62497_c0      | 13.89751364        | 0.031060459 |
| comp87035_c5      | 0.522368803        | 0.032163598 |
| comp75928_c0      | 85.09750094        | 0.036731105 |
| comp82468_c1      | 6.646879517        | 0.036936271 |
| comp35877_c1      | 8.558968348        | 0.036936271 |
| comp86920_c1      | 0.42039615         | 0.041893328 |
| comp91844_c3      | 85.10279393        | 0.041893328 |
| comp255391_c0     | 0.122154402        | 0.041893328 |
| comp87071_c2      | 5.591675309        | 0.041893328 |
| comp35285_c0      | 2.18272596         | 0.046608407 |

**Table S18:** List of 124 transcripts identified as DE in a pairwise comparison between time window 1 and time window 3

| <b>Transcript</b> | <b>Fold Change</b> | <b>FDR</b>  |
|-------------------|--------------------|-------------|
| comp35107_c1      | 41.62059352        | 1.63E-08    |
| comp92265_c0      | 44.16514369        | 5.14E-07    |
| comp38965_c0      | 124.5553127        | 1.69E-06    |
| comp86806_c0      | 351.5948264        | 8.15E-05    |
| comp80157_c2      | 4.875100562        | 9.92E-05    |
| comp89617_c0      | 0.283276641        | 9.92E-05    |
| comp78391_c2      | 3.078677156        | 0.000177796 |
| comp35693_c0      | 0.254851951        | 0.000540388 |
| comp72468_c0      | 0.234277618        | 0.000690412 |
| comp81803_c0      | 2.971293206        | 0.000773246 |
| comp89415_c1      | 2.536580022        | 0.000773468 |
| comp42921_c0      | 2.44513865         | 0.000837202 |
| comp388637_c0     | 66.33635356        | 0.001104366 |
| comp92923_c0      | 32.52828075        | 0.00121689  |
| comp94434_c0      | 2.402020453        | 0.001359336 |
| comp94479_c0      | 8.677547285        | 0.001481186 |
| comp51650_c0      | 72.39438954        | 0.001671554 |
| comp35102_c0      | 2.609360842        | 0.001671554 |
| comp72075_c0      | 2.271907111        | 0.002768533 |
| comp87227_c2      | 0.281042559        | 0.003059639 |
| comp93451_c0      | 0.490816238        | 0.003076272 |
| comp75928_c0      | 296.4334779        | 0.003076272 |
| comp55051_c0      | 0.458834444        | 0.003522094 |
| comp89084_c0      | 46.10386084        | 0.003547779 |
| comp77929_c0      | 2.476602443        | 0.003547779 |
| comp92807_c0      | 4.369939288        | 0.004278948 |
| comp54867_c0      | 0.158205609        | 0.004464485 |
| comp86920_c1      | 0.384591552        | 0.005495493 |
| comp81416_c0      | 0.281721148        | 0.005495493 |
| comp35297_c0      | 0.307749793        | 0.005495493 |
| comp90925_c6      | 0.386170581        | 0.005578998 |
| comp71289_c1      | 2.450371111        | 0.005848849 |
| comp35767_c0      | 50.88281029        | 0.006125543 |
| comp91531_c2      | 0.488835605        | 0.006125543 |
| comp35134_c1      | 5.078354074        | 0.006331317 |
| comp91844_c6      | 9.588393283        | 0.006331317 |
| comp62653_c1      | 0.264478854        | 0.006950003 |
| comp93714_c0      | 2.345100401        | 0.008421684 |
| comp75525_c2      | 3.4475625          | 0.008518746 |

---

|               |             |             |
|---------------|-------------|-------------|
| comp69006_c0  | 0.193777858 | 0.008660182 |
| comp101029_c0 | 8.342688272 | 0.009146392 |
| comp55866_c0  | 2.743141967 | 0.009146392 |
| comp90592_c12 | 9.745642207 | 0.009146392 |
| comp96310_c0  | 5.177483256 | 0.010631298 |
| comp64053_c1  | 2.383494979 | 0.011046193 |
| comp77793_c3  | 3.703659127 | 0.011591791 |
| comp88866_c1  | 18.25062458 | 0.011591791 |
| comp90918_c1  | 0.238067911 | 0.011591791 |
| comp92821_c0  | 0.234629843 | 0.011591791 |
| comp83232_c1  | 0.418244114 | 0.01212127  |
| comp35188_c0  | 2.512101169 | 0.01212127  |
| comp84301_c1  | 0.528306176 | 0.013802408 |
| comp85451_c1  | 4.054877957 | 0.013802408 |
| comp93257_c0  | 0.435928722 | 0.013802408 |
| comp34724_c0  | 0.267386195 | 0.013802408 |
| comp96168_c0  | 0.387384733 | 0.013802408 |
| comp86806_c1  | 35.31901296 | 0.014355245 |
| comp81954_c0  | 0.144236576 | 0.014699988 |
| comp77793_c2  | 3.300349104 | 0.015079458 |
| comp62497_c0  | 13.79001673 | 0.015675878 |
| comp71932_c0  | 2.191711532 | 0.015675878 |
| comp35867_c0  | 0.463667913 | 0.016037764 |
| comp103811_c0 | 0.438422109 | 0.016086194 |
| comp78122_c1  | 0.510227368 | 0.019400733 |
| comp77973_c0  | 3.614087566 | 0.019400733 |
| comp147611_c0 | 0.174430724 | 0.020012179 |
| comp71348_c1  | 6.096575179 | 0.020012179 |
| comp55670_c0  | 8.477802142 | 0.020012179 |
| comp87716_c1  | 0.424807026 | 0.020012179 |
| comp31797_c1  | 0.036780193 | 0.020012179 |
| comp89772_c0  | 0.489748035 | 0.021058981 |
| comp592517_c0 | 0.184439745 | 0.021058981 |
| comp88228_c0  | 11.34001519 | 0.021275559 |
| comp93952_c0  | 2.215977928 | 0.02142318  |
| comp35285_c0  | 2.199379674 | 0.021539194 |
| comp84585_c0  | 0.54072815  | 0.021565982 |
| comp99868_c0  | 3.556355483 | 0.021565982 |
| comp79509_c0  | 0.244724285 | 0.02193375  |
| comp79487_c0  | 0.124821608 | 0.022851406 |
| comp84080_c0  | 0.525602531 | 0.023148154 |
| comp70446_c0  | 0.485318874 | 0.023631247 |

---

---

|               |             |             |
|---------------|-------------|-------------|
| comp84940_c2  | 24.32895611 | 0.023829678 |
| comp91837_c4  | 24.32444728 | 0.023829678 |
| comp77858_c0  | 2.726496511 | 0.023829678 |
| comp89398_c0  | 0.215875969 | 0.024801449 |
| comp82323_c0  | 2.64569673  | 0.02779823  |
| comp414989_c0 | 24.37367646 | 0.028369781 |
| comp90486_c1  | 0.366662457 | 0.030502355 |
| comp73339_c0  | 3.275138883 | 0.030744869 |
| comp38609_c0  | 0.043311641 | 0.030744869 |
| comp66814_c0  | 0.04334664  | 0.030744869 |
| comp79848_c1  | 0.039679042 | 0.031876991 |
| comp85721_c1  | 0.371170827 | 0.031986683 |
| comp86930_c0  | 0.374360704 | 0.033530463 |
| comp78315_c0  | 0.502308382 | 0.033746451 |
| comp117149_c0 | 0.100488563 | 0.033746451 |
| comp35337_c0  | 5.321273778 | 0.034945224 |
| comp79176_c0  | 0.209526904 | 0.036280221 |
| comp34931_c0  | 0.414122298 | 0.036280221 |
| comp88021_c0  | 0.320873657 | 0.037224073 |
| comp55974_c0  | 0.366132034 | 0.038195687 |
| comp378614_c0 | 0.042646378 | 0.038246215 |
| comp74630_c0  | 7.592060618 | 0.038391387 |
| comp75279_c0  | 22.35969196 | 0.039156917 |
| comp87121_c0  | 0.460622995 | 0.039277231 |
| comp93445_c0  | 2.127930473 | 0.039442018 |
| comp34949_c0  | 2.858494038 | 0.04080457  |
| comp83562_c0  | 0.383569793 | 0.041149023 |
| comp82340_c1  | 0.414984732 | 0.043924934 |
| comp34934_c1  | 0.200406735 | 0.043924934 |
| comp89250_c4  | 0.35787063  | 0.044566686 |
| comp303244_c0 | 14.94919677 | 0.047008271 |
| comp94085_c0  | 3.157270063 | 0.048079281 |
| comp95443_c0  | 1.824167904 | 0.048481555 |
| comp35195_c0  | 0.559542992 | 0.048525017 |
| comp86255_c2  | 0.357267624 | 0.048525017 |
| comp36828_c0  | 10.03561238 | 0.048525017 |
| comp82539_c0  | 10.02910353 | 0.048525017 |
| comp85037_c0  | 10.02113494 | 0.048525017 |
| comp70806_c0  | 2.497715551 | 0.048525017 |
| comp83593_c0  | 0.497083606 | 0.048525017 |
| comp252844_c0 | 0.047485263 | 0.048525017 |
| comp94060_c0  | 5.836095459 | 0.048677117 |

---

---

|              |            |             |
|--------------|------------|-------------|
| comp68925_c0 | 1.83125968 | 0.049249639 |
|--------------|------------|-------------|

---

**Table S19:** List of 31 DE transcripts annotated with a long non-coding RNA

comp35693\_c0  
comp72468\_c0  
comp86920\_c1  
comp81416\_c0  
comp91531\_c2  
comp62653\_c1  
comp75525\_c2  
comp101029\_c0  
comp90918\_c1  
comp96168\_c0  
comp62497\_c0  
comp77973\_c0  
comp147611\_c0  
comp71348\_c1  
comp592517\_c0  
comp88228\_c0  
comp84940\_c2  
comp414989\_c0  
comp90486\_c1  
comp38609\_c0  
comp66814\_c0  
comp378614\_c0  
comp74630\_c0  
comp34949\_c0  
comp82340\_c1  
comp94085\_c0  
comp86255\_c2  
comp252844\_c0  
comp48055\_c0  
comp255391\_c0  
comp87071\_c2



**Table S20:** List of DE transcripts that are bound or upregulated by PRR5 [34]

| <b>Transcript</b> | <b><i>Arabidopsis</i><br/>gene name</b> | <b><i>Arabidopsis</i> gene annotation</b>                                      | <b>AT#</b> | <b>Bound by<br/>PRR5?</b> | <b>Upregulated<br/>by PRR5?</b> |
|-------------------|-----------------------------------------|--------------------------------------------------------------------------------|------------|---------------------------|---------------------------------|
| comp91531_c2      | RSH2                                    | RELA-SPOT HOMOLOG 2                                                            | AT3G14050  | Yes                       | No                              |
| comp89415_c1      | JMJD5/<br>JMJD30                        | JUMONJI DOMAIN CONTAINING 5 /<br>JUMONJI-C DOMAIN-CONTAINING<br>PROTEIN 30     | AT3G20810  | Yes                       | No                              |
| comp78122_c1      | LNK1/2                                  | NIGHT LIGHT-INDUCIBLE AND CLOCK-<br>REGULATED 2                                | AT3G54500  | Yes                       | Yes                             |
| comp93952_c0      | RPL23aB                                 | 60s ribosomal protein L23a-2                                                   | AT3G55280  | Yes                       | No                              |
| comp35195_c0      | TIR1                                    | TRANSPORT INHIBITOR RESPONSE 1                                                 | AT3G62980  | Yes                       | No                              |
| comp71932_c0      | QCR7                                    | Cytochrome b-c1 complex subunit 7-1                                            | AT4G32470  | Yes                       | No                              |
| comp83562_c0      | BBX19                                   | B-BOX DOMAIN PROTEIN 19                                                        | AT4G38960  | No                        | Yes                             |
| comp35134_c1      | -                                       | Histone h2b                                                                    | AT5G02570  | Yes                       | No                              |
| comp90486_c1      | PRR5                                    | PSEUDO-RESPONSE REGULATOR 5                                                    | AT5G24470  | Yes                       | Yes                             |
| comp84080_c0      | -                                       | P-loop containing nucleoside<br>triphosphate hydrolases superfamily<br>protein | AT5G35970  | No                        | Yes                             |

**Table S21:** List of DE transcripts that have previously been identified as circadian clock-associated and/or light/diurnally-regulated

| Transcript   | <i>Arabidopsis</i> gene name | <i>Arabidopsis</i> gene annotation                                       | AT#       | Supporting references |
|--------------|------------------------------|--------------------------------------------------------------------------|-----------|-----------------------|
| comp42921_c0 | FKF1                         | FLAVIN-BINDING, KELCH REPEAT, F BOX 1                                    | AT1G68050 | [58]                  |
| comp70806_c0 | BBX21                        | B-BOX DOMAIN PROTEIN 21                                                  | AT1G75540 | [59]                  |
| comp72075_c0 | CRY2                         | CRYPTOCHROME 2                                                           | AT1G04400 | [60, 61]              |
| comp78122_c1 | LNK1/2                       | NIGHT LIGHT-INDUCIBLE AND CLOCK-REGULATED 2                              | AT3G54500 | [62]                  |
| comp83562_c0 | BBX19                        | B-BOX DOMAIN PROTEIN 19                                                  | AT4G38960 | [63]                  |
| comp84080_c0 | -                            | P-loop containing nucleoside triphosphate hydrolases superfamily protein | AT5G35970 | [64]                  |
| comp84301_c1 | TIC55                        | TRANSLOCON AT THE INNER ENVELOPE MEMBRANE OF CHLOROPLASTS 55             | AT2G24820 | [65]                  |
| comp84585_c0 | PHOT2                        | PHOTOTROPIN 2                                                            | AT5G58140 | [66]                  |
| comp87227_c2 | EPR1                         | EARLY PHYTOCHROME RESPONSIVE 1                                           | AT1G18330 | [67]                  |
| comp89415_c1 | JMJD5/<br>JMJD30             | JUMONJI DOMAIN CONTAINING 5/JUMONJI-C DOMAIN-CONTAINING PROTEIN 30       | AT3G20810 | [68]                  |
| comp89617_c0 | CRY3                         | CRYPTOCHROME 3                                                           | AT5G24850 | [69]                  |
| comp90486_c1 | PRR5                         | PSEUDO-RESPONSE REGULATOR 5                                              | AT5G24470 | [70]                  |
| comp91531_c2 | RSH2                         | RELA-SPOT HOMOLOG 2                                                      | AT3G14050 | [71]                  |

[58] Song YH, Smith RW, To BJ, Millar AJ, Imaizumi T. FKF1 conveys timing information for CONSTANS stabilization in photoperiodic flowering. *Science*. 2012;336(6084):1045-1049.

[59] Xu D, Li J, Gangappa SN, Hettiarachchi C, Lin F, Andersson MX et al. Convergence of light and ABA signaling on the *ABI5* promoter. *PLoS Genet*. 2014;10(2):e1004197.

[60] Lin CT, Yang HY, Guo HW, Mockler T, Chen J, Cashmore AR. Enhancement of blue-light sensitivity of *Arabidopsis* seedlings by a blue light receptor cryptochrome 2. *Proc Natl Acad Sci U S A*. 1998;95(5):2686-2690.

[61] Toth R, Kevei E, Hall A, Millar AJ, Nagy F, Kozma-Bognar L. Circadian clock-regulated expression of phytochrome and cryptochrome genes in *Arabidopsis*. *Plant Physiol*. 2001;127(4):1607-1616.

[62] Rugnone ML, Soverna AF, Sanchez SE, Schlaen RG, Hernando CE, Seymour DK et al. *LNK* genes integrate light and clock signaling networks at the core of the *Arabidopsis* oscillator. *Proc Natl Acad Sci U S A*. 2013;110(29):12120-12125.

[63] Li G, Siddiqui H, Teng YB, Lin RC, Wan XY, Li JG et al. Coordinated transcriptional regulation underlying the circadian clock in *Arabidopsis*. *Nat Cell Biol*. 2011;13(5):616-U275.

[64] Kleine T, Kindgren P, Benedict C, Hendrickson L, Strand A. Genome-wide gene expression analysis reveals a critical role for CRYPTOCHROME1 in the response of *Arabidopsis* to high irradiance. *Plant Physiol*. 2007;144(3):1391-1406.

[65] Boij P, Patel R, Garcia C, Jarvis P, Aronsson H. *In vivo* Studies on the Roles of Tic55-Related Proteins in Chloroplast Protein Import in *Arabidopsis thaliana*. *Mol Plant*. 2009;2(6):1397-1409.

- [66] Christie JM, Salomon M, Nozue K, Wada M, Briggs WR. LOV (light, oxygen, or voltage) domains of the blue-light photoreceptor phototropin (nph1): Binding sites for the chromophore flavin mononucleotide. *Proc Natl Acad Sci U S A*. 1999;96(15):8779-8783.
- [67] Kuno N, Moller SG, Shinomura T, Xu XM, Chua NH, Furuya M. The novel MYB protein EARLY-PHYTOCHROME-RESPONSIVE1 is a component of a slave circadian oscillator in *Arabidopsis*. *Plant Cell*. 2003;15(10):2476-2488.
- [68] Jones MA, Covington MF, DiTacchio L, Vollmers C, Panda S, Harmer SL. Jumonji domain protein JMJD5 functions in both the plant and human circadian systems. *Proc Natl Acad Sci U S A*. 2010;107(50):21623-21628.
- [69] Pokorny R, Klar T, Hennecke U, Carell T, Batschauer A, Essen LO. Recognition and repair of UV lesions in loop structures of duplex DNA by DASH-type cryptochrome. *Proc Natl Acad Sci U S A*. 2008;105(52):21023-21027.
- [70] Nakamichi N, Kita M, Ito S, Yamashino T, Mizuno T. PSEUDO-RESPONSE REGULATORS, PRR9, PRR7 and PRR5, together play essential roles close to the circadian clock of *Arabidopsis thaliana*. *Plant Cell Physiol*. 2005;46(5):686-698.
- [71] Mizusawa K, Masuda S, Ohta H. Expression profiling of four RelA/SpoT-like proteins, homologues of bacterial stringent factors, in *Arabidopsis thaliana*. *Planta*. 2008;228(4):553-562.

**Table S22:** List of 29 DE transcripts identified as diurnally regulated in Blasing *et al.* [35]

comp35188\_c0  
comp35195\_c0  
comp42921\_c0  
comp55866\_c0  
comp70446\_c0  
comp70806\_c0  
comp75525\_c2  
comp77858\_c0  
comp77929\_c0  
comp78122\_c1  
comp78315\_c0  
comp79848\_c1  
comp80157\_c2  
comp81803\_c0  
comp83232\_c1  
comp83562\_c0  
comp84080\_c0  
comp84301\_c1  
comp85451\_c1  
comp85721\_c1  
comp89415\_c1  
comp89617\_c0  
comp89772\_c0  
comp91531\_c2  
comp92821\_c0  
comp93257\_c0  
comp93952\_c0  
comp94434\_c0  
comp99868\_c0

**Table S23:** List of online resources used in this article and their sources

| Databases / transcriptomes     | Source                                                                                                                                                                                                                                                                            |
|--------------------------------|-----------------------------------------------------------------------------------------------------------------------------------------------------------------------------------------------------------------------------------------------------------------------------------|
| <i>Medicago truncatula</i> CDS | <a href="ftp://ftp.jcvi.org/pub/data/m_truncatula/Mt4.0/Annotation/Mt4.0v1/Mt4.0v1_GenesCDSSeq_20130731_1800.fasta">ftp://ftp.jcvi.org/pub/data/m_truncatula/Mt4.0/Annotation/Mt4.0v1/Mt4.0v1_GenesCDSSeq_20130731_1800.fasta</a>                                                 |
| Duarte contigs                 | <a href="http://www.ncbi.nlm.nih.gov/nucore/GAMJ00000000">http://www.ncbi.nlm.nih.gov/nucore/GAMJ00000000</a>                                                                                                                                                                     |
| Franssen contigs               | <a href="http://www.ncbi.nlm.nih.gov/nucore?term=66035%5BBioProject%5D">http://www.ncbi.nlm.nih.gov/nucore?term=66035%5BBioProject%5D</a>                                                                                                                                         |
| Kaur contigs                   | <a href="http://www.ccforum.com/content/supplementary/1471-2164-13-104-s1.txt">http://www.ccforum.com/content/supplementary/1471-2164-13-104-s1.txt</a>                                                                                                                           |
| Kaspa contigs                  | <a href="http://www.ncbi.nlm.nih.gov/nucore?term=277074%5BbioProject%5D">http://www.ncbi.nlm.nih.gov/nucore?term=277074%5BbioProject%5D</a>                                                                                                                                       |
| Parafield contigs              | <a href="http://www.ncbi.nlm.nih.gov/nucore?term=277076%5BBioProject%5D">http://www.ncbi.nlm.nih.gov/nucore?term=277076%5BBioProject%5D</a>                                                                                                                                       |
| Uni-prot pea proteins          | <a href="http://www.uniprot.org/uniprot/?query=organism:3888">http://www.uniprot.org/uniprot/?query=organism:3888</a>                                                                                                                                                             |
| Swiss-prot pea proteins        | <a href="http://www.uniprot.org/uniprot/?query=organism:3888+reviewed:yes">http://www.uniprot.org/uniprot/?query=organism:3888+reviewed:yes</a>                                                                                                                                   |
| Ultra-conserved orthologs      | <a href="http://cgpdb.ucdavis.edu/cgpdb2/data_analysis/reference_genome_set/Arabidopsis/A_thaliana_ATGC_2006_08_24.protein.COS_ULTRA.fasta">http://cgpdb.ucdavis.edu/cgpdb2/data_analysis/reference_genome_set/Arabidopsis/A_thaliana_ATGC_2006_08_24.protein.COS_ULTRA.fasta</a> |

**Table S24:** List of primers used for qRT-PCR analysis.

| <b>Transcript</b> | <b>Forward primer (5' to 3')</b> | <b>Reverse primer (5' to 3')</b> |
|-------------------|----------------------------------|----------------------------------|
| PsTUBLIN2         | AGATGGCTTCAACTTTCATTGG           | GCTCTCGGCTTCGGTGA                |
| comp35195_c0      | AAAATGGCAGCAAGTCCATC             | GGTTGGGGTGGTTATGTTTG             |
| comp35285_c0      | TCGATCTGGGAGAAGAATGG             | AGCGTGACGAAACTGATTCC             |
| comp55670_c0      | GCCGACTTTCGTCTCTGTTC             | TAGTTTATCTGGGGCGGATG             |
| comp62497_c0      | TGAGGTTTTTGCTTTGATGC             | TGCAAAGAATCCCAATTGAT             |
| comp62653_c1      | GAATGATGGTTTCGGTTTGAG            | TCCCTCCACTCATCTCTCTCTC           |
| comp70446_c0      | CGGTGCAGTCTCATAGCAA              | ATCTCCGACATCACGTTTCC             |
| comp72075_c0      | CAATTGTTCCCTTGCCAAAT             | GGAGGAAATACGATCCAGCA             |
| comp75279_c0      | TGGCAAAAGTATGGCTATTGG            | AGCATGTAGAGAGGGCTTCG             |
| comp81803_c0      | CAAATGGCAATGATGATGGA             | ACTCCTTTGTGGTGCCTA               |
| comp84301_c1      | ATGCCGTGTCCCACTTTATC             | TCCATCAGAATGCAAGCAAG             |
| comp86920_c1      | GCAATCTGTTTCCACCATCC             | GGTTCTAGCTCAGCCAATCG             |
| comp86930_c0      | TAATGTTTCTCCGATCACG              | CGAAAACCCGACTAACAACC             |
| comp90486_c1      | AACGAGCAAGACCCTAAGCA             | CGTTTGAGAATGGGTGAGGT             |
| comp93451_c0      | CCACCGCTCGAAATATCAGT             | GGGCGTCTTAGCAACATTC              |
